# Supplementary material
Source: JCI journal article supplement (doi:10.1172/jci195170)
Supplement: sd1 [file 1]

## **SUPPLEMENTAL MATERIAL**

Mitochondrial dysfunction drives natural killer cell dysfunction in systemic lupus erythematosus

Natalia W. Fluder<sup>1</sup>, Morgane Humbel<sup>2</sup>, Emeline Recazens<sup>3</sup>, Alexis A. Jourdain<sup>3</sup>, Camillo Ribi<sup>1</sup>, George C. Tsokos<sup>2</sup>, Denis Comte<sup>4</sup>

Affiliations:

<sup>1</sup> Department of Medicine, Division of Immunology and Allergy, Lausanne University Hospital, University of Lausanne, 1011 Lausanne, Switzerland.

<sup>2</sup> Department of Medicine, Beth Israel Deaconess Medical Center, Harvard Medical School, Boston, USA.

<sup>3</sup> Department of Immunobiology, University of Lausanne, 1066 Epalinges, Switzerland.

<sup>4</sup> Department of Medicine, Division of Internal Medicine, Lausanne University Hospital, University of Lausanne, 1011 Lausanne, Switzerland.

## SUPPLEMENTAL METHODS

**Transmission electron microscopy (TEM)** Cells were centrifuged at approximately  $700 \times g$  (corresponding to  $\sim 2500$  rpm in a standard benchtop centrifuge), the supernatant was removed and the cells were then fixed in 2.5% glutaraldehyde solution (EMS, Hatfield, PA) and in osmium tetroxide 1% (EMS) with 1.5% of potassium ferrocyanide (Sigma, St. Louis, MO) in phosphate buffer (PB 0.1 M [pH 7.4]) for 1h at room temperature. The samples were then centrifuged at approximately  $2800 \times g$  (corresponding to  $\sim 5000$  rpm), the supernatant was removed and replaced with distilled water twice. Then the cells were centrifuged again at approximately  $2800 \times g$  (corresponding to  $\sim 5000$  rpm) and the supernatant removed. After that, the cells were dehydrated in acetone solution (Sigma, St Louis, MO, USA) at graded concentrations (30%-15 min; 70% - 15 min; 100% - 4x15). This was followed by infiltration in Epon resin (EMS, Hatfield, PA, US) at graded concentrations (Epon 33% in acetone-2h; Epon 66% in acetone-4h; Epon 100%-2x8h) and finally polymerized for 48h at  $60^{\circ}\text{C}$  in an oven. Ultrathin sections of 50 nm were cut using a Leica UC7 (Leica Mikrosysteme GmbH, Vienna, Austria), picked up on a copper slot grid 2x1mm (EMS, Hatfield, PA, US) coated with a polystyrene film (Sigma, St Louis, MO, USA). Sections were post-stained with uranyl acetate (Sigma, St Louis, MO, USA) 4% in H<sub>2</sub>O for 10 min, rinsed several times with H<sub>2</sub>O followed by Reynolds lead citrate in H<sub>2</sub>O (Sigma, St Louis, MO, USA) for 10 min and rinsed several times with H<sub>2</sub>O. Micrographs were taken with a transmission electron microscope FEI CM100 (FEI, Eindhoven, The Netherlands) at an acceleration voltage of 80kV with a TVIPS TemCamF416 digital camera (TVIPS GmbH, Gauting, Germany).

Note: Relative centrifugal force ( $\times g$ ) values were estimated from the originally reported rpm, as the exact centrifuge model and rotor radius were not available

**Proteomic analyses** Sample preparation and protein digestion: Washed cell pellets (3-5  $10^5$  cells) were lysed in 25  $\mu\text{l}$  miST lysis buffer (1% Sodium deoxycholate, 100mM Tris pH 8.6, 10 mM DTT) and heated for 10min at  $75^{\circ}\text{C}$ . Proteins were digested following a modified version of the iST method (Kulak, et al., 2014) (named miST method). Based on tryptophane fluorescence quantification (Wisniewski, et al., 2015), approximately 30  $\mu\text{g}$  of proteins at  $1\mu\text{g}/\mu\text{l}$  were transferred to new tubes, diluted 1:1 (v:v) with water containing 4mM MgCl<sub>2</sub> and benzonase (Merck #70746, 100x dil of stock = 250 Units/ $\mu\text{l}$ ), and incubated for 15 minutes at room temperature to digest

nucleic acids. Reduced disulfides were alkylated by adding ¼ vol. of 160 mM chloroacetamide (32 mM final) and incubating for 45min at room temperature in the dark. Samples were adjusted to 3 mM EDTA and digested with 0.5 µg Trypsin/LysC mix (Promega #V5073) for 1h at 37°C, followed by a second 1h digestion with an additional 0.5µg of proteases. To remove sodium deoxycholate, two sample volumes of isopropanol containing 1% TFA were added to the digests, and the samples were desalted on a strong cation exchange (SCX) plate (Oasis MCX; Waters Corp., Milford, MA) by centrifugation. After washing with isopropanol 1%TFA, peptides were eluted in 200µl of 80% MeCN, 19% water, 1% (v/v) ammonia, and dried by centrifugal evaporation.

**Liquid Chromatography-Mass Spectrometry analyses** LC-MS/MS analyses were carried out on a TIMS-TOF Pro (Bruker, Bremen, Germany) mass spectrometer interfaced through a nanospray ion source (“captive spray”) to an Ultimate 3000 RSLCnano HPLC system (Dionex). Peptides were separated on a reversed-phase custom packed 45 cm C18 column (75 µm ID, 100Å, Reprosil Pur 1.9 µm particles, Dr. Maisch, Germany) at a flow rate of 250 nl/min with a 2-27% acetonitrile gradient in 93 min followed by a ramp to 45% in 15 min and to 90% in 5 min (total method time: 140 min, all solvents contained 0.1% formic acid). Approximately 0.25 µg of digest were injected.

The data-independent acquisition (DIA) used mostly the instrument parameters reported previously (Meier, et al. 2020). Per cycle, the mass range 400-1200 m/z was covered by a total of 32 windows, each 25 Th wide and a 1/k0 range of 0.3. Collision energy was ramped linearly based uniquely on the 1/k0 values from 20 (at 1/k0=0.6) to 59 eV (at 1/k0=1.6). Two windows were acquired per TIMS scan (100ms) so that the total cycle time was 1.7 s.

**Data processing** Raw Bruker MS DIA data were processed directly with Spectronaut 16.1 (Biognosys, Schlieren, Switzerland) with the Pulsar engine using the “deep” setting and searching the human SWISSPROT database ([www.uniprot.org](http://www.uniprot.org)) of January 7<sup>th</sup>, 2022 (20'375 sequences). For identification, peptides of 7-52 AA length were considered, cleaved with trypsin/P specificity and a maximum of 2 missed cleavages. Carbamidomethylation of cysteine (fixed), methionine oxidation and N-terminal protein acetylation (variable) were the modifications applied. FDR's for peptide and protein group identifications were all at 1%. Ion mobility for peptides was predicted using a

deep neural network and used in scoring. The library created contained overall 91'819 precursors (71'900 peptides).

Peptide-centric analysis of DIA data was done with Spectronaut 16.1 using the library generated by Pulsar from DIA data. Single hits proteins (defined as matched by one stripped sequence only) were kept in the Spectronaut analysis. Peptide quantitation was based on XIC area, for which a minimum of 1 and a maximum of 3 (the 3 best) precursors were considered for each peptide, from which the median value was selected. Quantities for protein groups were derived from inter-run peptide ratios based on MaxLFQ algorithm (Cox et al 2014). Global normalization of runs/samples was done based on the median of peptides. Overall, 6'360 protein groups were identified at 1% FDR.

**Data analysis** All subsequent analyses were done with the Perseus software package (version 1.6.15.0) (Tyanova et al 2016). Quantities were log<sub>2</sub>-transformed and contaminants removed. After assignment to conditions, only proteins quantified in at least 2 samples of one condition were kept (6'256 protein groups). After missing values imputation (based on normal distribution using Perseus default parameters), t-tests were carried out among all conditions, with permutation-based FDR correction for multiple testing (Q-value threshold <0.05). Imputed values were later removed. The difference of means obtained from the tests were used for 1D enrichment analysis on associated GO/KEGG annotations as described (Cox and Mann, 2012). The enrichment analysis was also FDR-filtered (Benjamini-Hochberg, Q-val<0.02).

Supplemental Table 1: Characteristics of SLE patients included in the study.

| FIGURE            | SAMPLE  | SLEDAI | TREATMENT                            | YOB  | SEX |
|-------------------|---------|--------|--------------------------------------|------|-----|
| Fig 1. A, B, C, D | SLE 001 | 4      | HCQ, Belι                            | 1970 | F   |
|                   | SLE 002 | 3      | AZA                                  | 1963 | F   |
|                   | SLE 003 | 14     | NA                                   | 1954 | F   |
|                   | SLE 004 | 6      | PDN5, HCQ, Belι, RTX, CIA, MTX, IVlg | 1993 | F   |
|                   | SLE 005 | 2      | HCQ                                  | 1965 | F   |
|                   | SLE 006 | 8      | PDN2.5, HCQ                          | 1965 | F   |
|                   | SLE 007 | 2      | AZA, CYC, RTX, IVlg                  | 1969 | F   |
|                   | SLE 008 | 25     | PDN17.5, HCQ, Belι, MMF              | 1982 | F   |
|                   | SLE 009 | 5      | No treatment                         | 2000 | M   |
|                   | SLE 010 | 12     | HCQ                                  | 1996 | M   |
|                   | SLE 011 | 18     | PDN8, HCQ, MMF, Belι                 | 1992 | F   |
|                   | SLE 012 | 4      | PDN5, HCQ, Belι                      | 1983 | F   |
|                   | SLE 013 | 10     | HCQ                                  | 1944 | F   |
|                   | SLE 014 | 11     | NSAIDS                               | 1972 | F   |
|                   | SLE 015 | 7      | HCQ                                  | 1991 | F   |
|                   | SLE 016 | 0      | HCQ                                  | 1970 | F   |
|                   | SLE 017 | 2      | PDN5                                 | 1948 | F   |
|                   | SLE 018 | 24     | PDN50, NSAIDS                        | 2000 | F   |
| Fig 1. F          | SLE 019 | 4      | PDN2.5, HCQ                          | 1970 | F   |
|                   | SLE 020 | 0      | PDN2.5, HCQ                          | 1980 | F   |
|                   | SLE 021 | 6      | PDN30, HCQ                           | 1996 | F   |
|                   | SLE 022 | 8      | HCQ                                  | 1980 | F   |
|                   | SLE 023 | 22     | HCQ                                  | 1973 | F   |
| Fig 1. G          | SLE 024 | 37     | PDN, HCQ                             | 1986 | F   |
|                   | SLE 025 | 2      | HCQ                                  | 1980 | F   |
|                   | SLE 026 | 0      | PDN, HCQ, MMF                        | 1994 | F   |
|                   | SLE 027 | 3      | Belι                                 | 1973 | F   |
|                   | SLE 028 | 3      | HCQ                                  | 1984 | M   |
|                   | SLE 029 | 13     | PDN, HCQ, MMF                        | 1996 | F   |
|                   | SLE 030 | 2      | HCQ                                  | 1965 | F   |
|                   | SLE 031 | 4      | PDN, HCQ                             | 1956 | F   |
|                   | SLE 032 | 18     | PDN, HCQ, MMF                        | 1972 | F   |
|                   | SLE 033 | 2      | HCQ                                  | 1991 | F   |
|                   | SLE 034 | 2      | HCQ                                  | 1982 | F   |
|                   | SLE 035 | 0      | HCQ                                  | 1985 | F   |
|                   | SLE 036 | 8      | HCQ                                  | 1980 | F   |
|                   | SLE 037 | 8      | PDN, HCQ                             | 1972 | F   |
|                   | SLE 038 | 23     | No treatment                         | 1990 | F   |
|                   | SLE 039 | 24     | PDN                                  | 2000 | F   |

|                       |         |                  |                        |      |    |
|-----------------------|---------|------------------|------------------------|------|----|
| Fig 2. A, B, C        | SLE 040 | 2                | No treatment           | 1991 | F  |
|                       | SLE 041 | 0                | No treatment           | 1972 | F  |
|                       | SLE 042 | 4                | HCQ                    | 1979 | F  |
|                       | SLE 043 | 11               | PDN7.5, HCQ            | 1990 | F  |
| Fig 2. D, E, Fig 3. A | SLE 044 | 0                | HCQ                    | 1973 | F  |
|                       | SLE 045 | 4                | PDN10, HCQ             | 1975 | M  |
|                       | SLE 046 | 8                | PDN15, HCQ             | 1980 | F  |
|                       | SLE 047 | 0                | PDN5, HCQ              | 1981 | F  |
|                       | SLE 048 | 0                | HCQ                    | 1991 | F  |
|                       | SLE 049 | 6                | PDN5, HCQ, Beli        | 1997 | F  |
|                       | SLE 050 | 20               | No treatment           | 1980 | M  |
|                       | SLE 051 | 10               | PDN7.5, HCQ, MTX       | 1976 | F  |
|                       | SLE 052 | NA               | NA                     | NA   | NA |
|                       | SLE 053 | 4                | PDN5, HCQ, MMF         | 1985 | M  |
|                       | SLE 054 | 0                | HCQ, MTX               | 1995 | F  |
|                       | SLE 055 | 26               | PDN40, HCQ, CYC        | 2000 | F  |
|                       | SLE 056 | 3                | Beli                   | 1973 | F  |
|                       | SLE 057 | 2                | PDN5, HCQ, Beli        | 1988 | F  |
|                       | SLE 058 | 26               | PDN40, HCQ, CYC        | 2000 | F  |
|                       | SLE 059 | 0                | PDN7.5, HCQ, MTX, Beli | 1996 | F  |
|                       | SLE 060 | 7                | PDN15, HCQ, AZA, Beli  | 1976 | F  |
|                       | SLE 061 | 1                | HCQ                    | 1970 | F  |
|                       | SLE 062 | 20               | No treatment           | 1980 | M  |
|                       | SLE 063 | NA               | NA                     | NA   | NA |
|                       | SLE 064 | 7                | Colchicine             | 1975 | M  |
|                       | SLE 065 | 2                | PDN5, HCQ, Beli        | 1997 | F  |
|                       | SLE 066 | 6                | PDN5, HCQ, Beli        | 1997 | F  |
|                       | SLE 067 | 30               | Etanercept             | 1985 | M  |
|                       | SLE 068 | 6                | PDN5, HCQ, Beli        | 1993 | F  |
|                       | SLE 069 | 6                | PDN7.5, CYC            | 1972 | F  |
|                       | SLE 070 | 2                | No treatment           | 1957 | F  |
|                       | SLE 071 | 0                | HCQ                    | 1973 | F  |
|                       | SLE 072 | 0                | HCQ                    | 1975 | F  |
|                       | SLE 073 | 37               | PDN40, HCQ             | 1986 | F  |
|                       | SLE 074 | 5                | PDN5, HCQ              | 1982 | F  |
|                       | SLE 075 | 0                | PDN5, HCQ, MMF         | 1978 | F  |
|                       | SLE 076 | 12               | PDN12.5, MMF           | 1992 | F  |
| SLE 077               | 23      | PDN7.5, HCQ, AZA | 1972                   | F    |    |
| Fig 3. C, D           | SLE 078 | 6                | PDN5, HCQ, Beli        | 1983 | F  |
|                       | SLE 079 | 0                | HCQ, Beli              | 1970 | F  |
|                       | SLE 080 | 0                | PDN5, HCQ              | 1935 | F  |

|                                                  |         |    |                      |      |    |
|--------------------------------------------------|---------|----|----------------------|------|----|
|                                                  | SLE 081 | 0  | PDN5, HCQ            | 1973 | M  |
|                                                  | SLE 082 | 2  | Beli                 | 1963 | F  |
|                                                  | SLE 083 | 0  | PDN5, MMF            | 1973 | F  |
|                                                  | SLE 084 | 4  | PDN5, HCQ, Beli, MMF | 1979 | F  |
|                                                  | SLE 085 | 2  | HCQ, Beli            | 1965 | F  |
|                                                  | SLE 086 | 6  | PDN5, HCQ, BEN       | 1983 | F  |
|                                                  | SLE 087 | 2  | RTX, HCQ             | 1981 | F  |
|                                                  | SLE 088 | 0  | HCQ                  | 1976 | F  |
|                                                  | SLE 089 | 0  | PDN5, HCQ, Beli      | 1968 | F  |
|                                                  | SLE 090 | 3  | No treatment         | 1962 | F  |
|                                                  | SLE 091 | 2  | PDN5, MTX, Beli      | 1980 | F  |
|                                                  | SLE 092 | 12 | PDN50, HCQ           | 1984 | F  |
| Fig 3. E, Fig 6.                                 | SLE 093 | 2  | PDN5, HCQ            | 1972 | F  |
|                                                  | SLE 094 | 0  | HCQ                  | 1962 | F  |
|                                                  | SLE 095 | 2  | PDN4, HCQ            | 1982 | F  |
|                                                  | SLE 096 | 6  | PDN5, HCQ, Beli      | 1983 | F  |
|                                                  | SLE 097 | 4  | PDN10, HCQ           | 1988 | F  |
|                                                  | SLE 098 | 8  | PDN20, HCQ, Beli     | 1988 | F  |
|                                                  | SLE 099 | 0  | HCQ, Beli            | 1965 | F  |
|                                                  | SLE 100 | 0  | HCQ                  | 1990 | F  |
|                                                  | SLE 101 | 0  | No treatment         | 1993 | F  |
|                                                  | SLE 102 | 8  | PDN5, HCQ, Beli      | 1972 | F  |
|                                                  | SLE 103 | 4  | PDN7.5, HCQ, Beli    | 1963 | F  |
|                                                  | SLE 104 | 6  | PDN5, HCQ, MTX, Beli | 1979 | F  |
|                                                  | SLE 105 | 0  | HCQ                  | 1990 | F  |
|                                                  | SLE 106 | 0  | HCQ                  | 1976 | F  |
|                                                  | SLE 107 | 2  | PDN2.5, HCQ          | 1962 | F  |
|                                                  | SLE 108 | NA | PDN7, HCQ, Beli      | 1982 | F  |
| Fig 4. A, B, C, D, E, F,<br>Fig 5. A, B, C, D, E | SLE 109 | 10 | PDN5, HCQ, MTX, Beli | 1979 | F  |
|                                                  | SLE 110 | 17 | No treatment         | 1999 | F  |
|                                                  | SLE 111 | 5  | PDN10, HCQ           | 1980 | M  |
|                                                  | SLE 112 | 3  | PDN5, MTX            | 1980 | F  |
|                                                  | SLE 113 | 0  | HCQ, CIA             | 1982 | F  |
|                                                  | SLE 114 | 0  | PDN5, HCQ, MTX       | 1991 | F  |
|                                                  | SLE 115 | 0  | PDN5, HCQ, MMF       | 1985 | M  |
|                                                  | SLE 116 | 0  | HCQ, Beli            | 1970 | F  |
|                                                  | SLE 117 | 4  | PDN5, HCQ, Beli      | 1940 | M  |
|                                                  | SLE 118 | 0  | HCQ                  | 1973 | F  |
|                                                  | SLE 119 | 2  | HCQ                  | 1981 | F  |
|                                                  | SLE 120 | 0  | Beli                 | 1973 | F  |
|                                                  | SLE 121 | NA | NA                   | NA   | NA |

|         |   |                |      |   |
|---------|---|----------------|------|---|
| SLE 122 | 0 | No treatment   | 1979 | F |
| SLE 123 | 2 | NA             | 1984 | M |
| SLE 124 | 0 | HCQ, Beli, MTX | 1978 | F |
| SLE 125 | 0 | HCQ            | 1955 | F |

Healthy controls were matched to patients for sex and ethnicity and were age-matched within  $\pm 10$  years. Abbreviation: PDN, prednisone; HCQ, hydroxychloroquine; Beli, belimumab, AZA, azathioprine, MMF, mycophenolate mofetil; MTX, methotrexate; CYC, cyclophosphamide; RTX: rituximab; CIA, cyclosporin A; IVIg, intravenous immunoglobulin; NSAIDS, nonsteroidal anti-inflammatory drugs; NA, indicates data not available from retrospective clinical records.

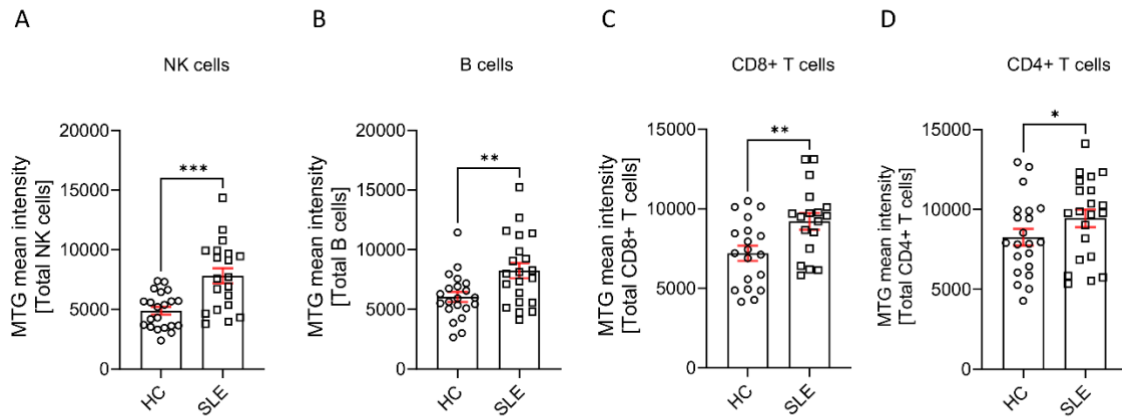

Supplemental figure 1: Comparison of mitochondrial mass among PBMC populations from SLE patients and healthy controls.

Mitochondrial mass in NK cells (A), B cells (B), CD8+ T cells (C), CD4+T cells (D) from HC (n=19) and SLE patients (n=19), assessed by flow cytometry using MitoTracker Green (MTG) after overnight resting. Each symbol represents one individual. \*p<0.05, by Wilcoxon test.

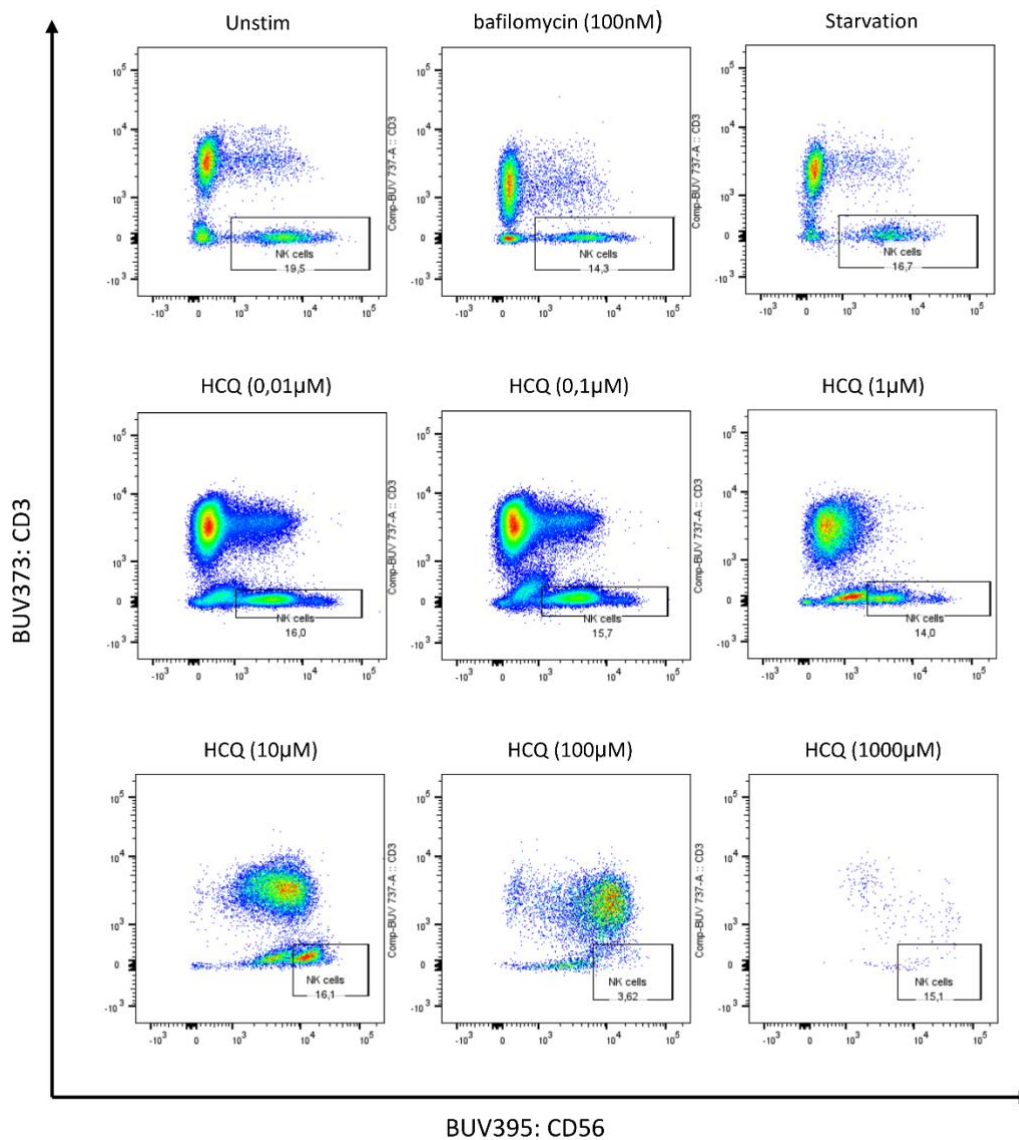

Supplemental figure 2: Impact of hydroxychloroquine concentration on NK cells phenotype alteration in healthy controls.

Representative flow cytometry dot plots showing gating strategy for NK cells ( $CD3^-CD56^+$ ) during assay optimization. Lysosomal number was assessed by flow cytometry based on LysoTracker mean fluorescence intensity (MFI). Peripheral blood mononuclear cells (PBMCs) from healthy controls were stimulated overnight in the presence or absence of bafilomycin A1 (100 nM), increasing concentrations of hydroxychloroquine (HCQ; 0.01, 0.1, 1, 10, 100, and 1000  $\mu$ M), or under starvation conditions.

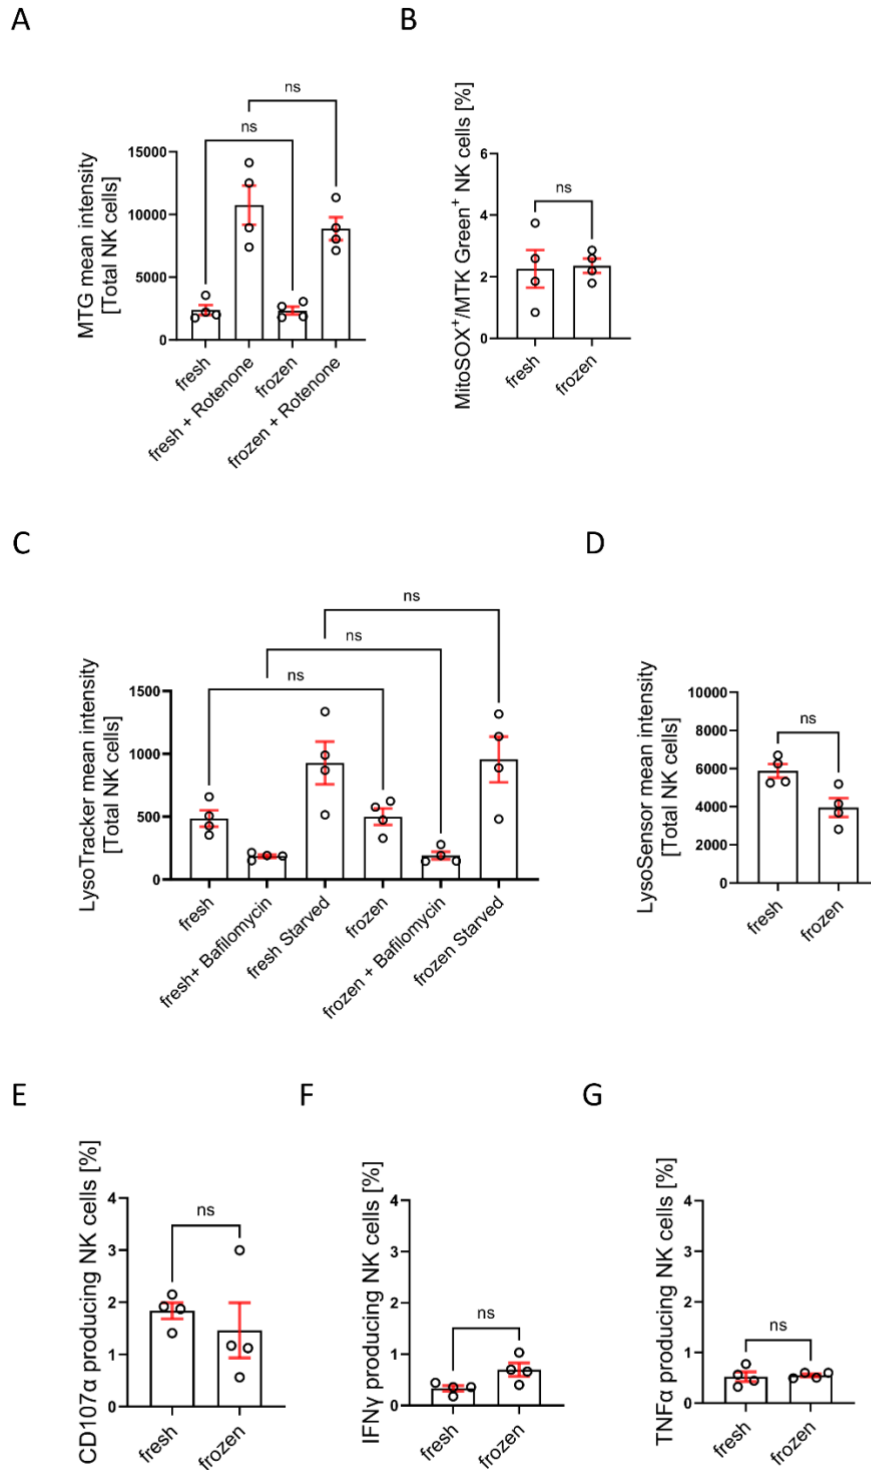

Supplemental figure 3: Comparable NK cells function and phenotype in freshly isolated versus frozen PBMCs.

Freshly isolated or thawed peripheral blood mononuclear cells (PBMCs) from healthy controls (HC) were rested overnight prior to analysis.

(A) Mitochondrial mass in NK cells assessed by flow cytometry using MitoTracker Green mean fluorescence intensity (MFI). \*p<0.05 by Wilcoxon test.

(B) Mitochondrial superoxide levels assessed by flow cytometry based on the frequency of MitoSOX<sup>+</sup>/MitoTracker Green<sup>+</sup> NK cells. Rotenone was used as a positive control. \*p<0.05 by paired t test.

(C, D) Lysosomal number (C) and lysosomal pH (D) in NK cells assessed by flow cytometry using LysoTracker and LysoSensor MFI, respectively. Bafilomycin A1 and starvation were used as negative and positive controls, respectively. \*p<0.05 by Wilcoxon test.

(E–G) NK cell function assessed after overnight resting. Degranulation (E) and cytokine production (F, G) were measured by flow cytometry based on the frequency CD107α<sup>+</sup> (E), IFNγ<sup>+</sup> (F), and TNFα<sup>+</sup> (G) cells. \*p<0.05, \*\*p<0.01, \*\*\*p<0.001, by Kruskal-Wallis test

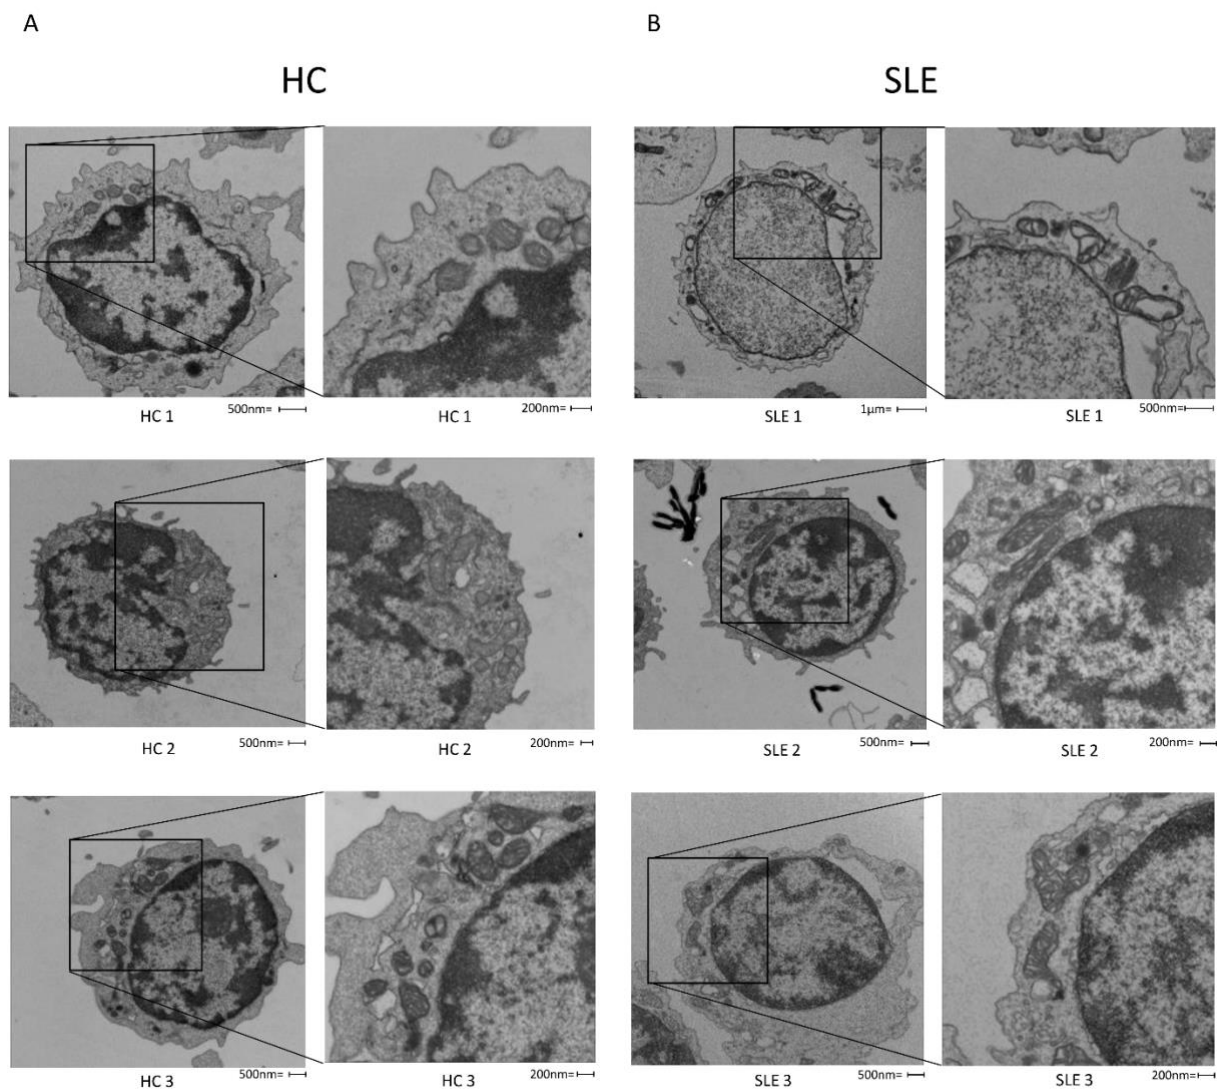

Supplemental figure 4: TEM comparison of mitochondrial ultrastructure in NK cells from healthy controls and SLE patients.

(A, B) Transmission electron microscopy (TEM) images of NK cells isolated from healthy controls (HC) (A) and SLE patients (B). Representative images illustrate mitochondrial ultrastructure within NK cells from each group.

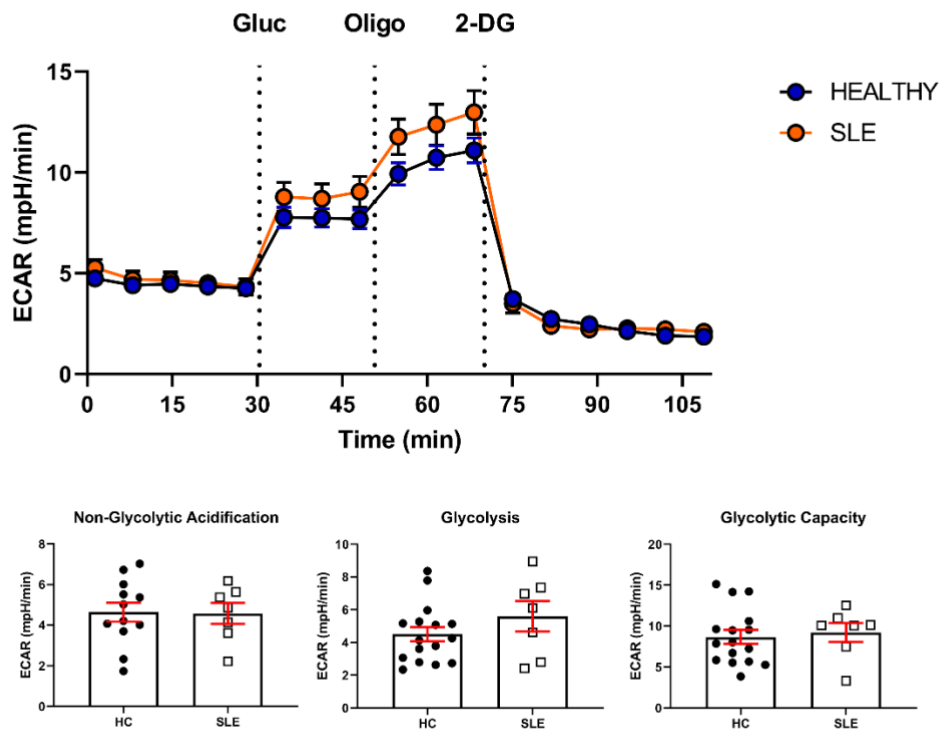

Supplemental figure 5: Exploratory Seahorse analysis of glycolytic flux (ECAR) in primary NK cells from healthy controls and SLE patients.

Extracellular acidification rate (ECAR) was measured over time in primary NK cells from healthy controls (HC, n=13) and SLE patients (n=7). Dotted lines indicate sequential injections of glucose (Glc), oligomycin (Oligo), and 2-deoxy-D-glucose (2-DG). Baseline ECAR reflects non-glycolytic acidification, whereas glucose and oligomycin injections allow assessment of glycolysis and glycolytic capacity, respectively. \* $p < 0.05$ , \*\* $p < 0.01$ , \*\*\* $p < 0.001$  by Welch's test.
